# Supplementary material for: Inflammatory biomarkers and cerebral small vessel disease: a community-based cohort study
Source: HighWire-hosted journal article supplement (doi:10.1136/svn-2021-001102), 2022-03-08
Supplement: svn-2021-001102supp001_data_supplement.pdf [file svn-2021-001102supp001_data_supplement.pdf]

**SUPPLEMENTAL MATERIAL**

**Supplemental Table I.** Comparison of baseline characteristics between included and excluded participants

**Supplemental Table II.** Magnetic resonance imaging protocols used in the Shunyi study

**Supplemental Table III.** Associations between the 3 groups of inflammatory biomarkers and cerebral microbleeds and perivascular space according to imaging results

**Supplemental Table I.** Comparison of baseline characteristics between included and excluded participants

| Characteristics                    | Included participants | Excluded participants | <i>P</i> value |
|------------------------------------|-----------------------|-----------------------|----------------|
|                                    | n=960                 | n=626                 |                |
| Age, y                             | 56.02±9.18            | 57.71±11.18           | < 0.001        |
| Female                             | 616(64.17%)           | 336(53.67%)           | < 0.001        |
| Body mass index, kg/m <sup>2</sup> | 26.55±3.80            | 26.09±3.84            | 0.022          |
| SBP, mmHg                          | 133.63±19.27          | 133.62±20.24          | 0.990          |
| DBP, mmHg                          | 78.72±10.82           | 78.55±11.58           | 0.769          |
| Current smoker                     | 210(22.41%)           | 171(28.45%)           | 0.008          |
| Current drinker                    | 21(2.24%)             | 36(6.00%)             | 0.001          |
| Total cholesterol, mmol/L          | 5±0.93                | 4.73±0.96             | <0.001         |
| HDL-c, mmol/L                      | 1.29±0.3              | 1.27±0.32             | 0.205          |
| LDL-c, mmol/L                      | 2.98±0.77             | 2.8±0.75              | <0.001         |
| Triglycerides, mmol/L              | 1.35(0.89, 2.00)      | 1.16(0.84, 1.71)      | 0.003          |
| Hypertension                       | 512(53.39%)           | 321(52.45%)           | 0.716          |
| Diabetes mellitus                  | 157(16.35%)           | 118(19.28%)           | 0.138          |
| Hyperlipemia                       | 483(50.31%)           | 248(40.62%)           | < 0.001        |

SBP indicates systolic blood pressure; DBP, diastolic blood pressure; HDL-c, high density lipoprotein cholesterol; LDL-c, low density lipoprotein cholesterol.

Missing data of included participants: body mass index, 24; SBP, 4; DBP, 4; current smoker, 23; hypertension, 1; missing data of excluded participants: body mass index,

47; SBP, 23; DBP, 23; current smoker, 25; hypertension,14; diabetes mellitus, 14;  
hyperlipemia, 14.

**Supplemental Table II.** Magnetic resonance imaging protocols used in the Shunyi

study

| Sequences                            | Parameters                                                                                                                                                                 |
|--------------------------------------|----------------------------------------------------------------------------------------------------------------------------------------------------------------------------|
| Three-dimensional T1-weighted images | TR = 2,530 ms; TE = 3.43 ms; inversion time = 1,100 ms; FOV = 256 mm × 256 mm; voxel size = 1 mm × 1 mm × 1.3 mm; flip angle = 8°; 144 sagittal slices, in the axial plane |
| T2-weighted images                   | TR = 6,000 ms; TE = 125 ms; FOV = 230 mm × 230 mm; flip angle = 90°; slice thickness = 5 mm, gap = 1 mm; 80 axial slices, in the axial plane                               |
| FLAIR images                         | TR = 8,500 ms; TE = 81 ms; FOV = 230 mm × 230 mm; flip angle = 150°; slice thickness = 5 mm, gap = 1 mm; 80 axial slices, in the axial plane                               |
| SWI images                           | TR = 27 ms; TE = 20 ms; FOV = 208 mm × 230 mm, flip angle = 15°; slice thickness = 1.5 mm; 80 axial slices, in the axial plane                                             |

TR indicates repetition time; TE, echo time; FOV, field of view; FLAIR, fluid-attenuated inversion recovery; SWI, susceptibility-weighted imaging.

**Supplemental Table III.** Associations between the 3 groups of inflammatory biomarkers and cerebral microbleeds and perivascular space according to imaging results

|               | Systemic biomarkers* |                |                |                | Endothelial-related biomarkers† |                |                |                | Media-related biomarkers‡ |                |                |                |
|---------------|----------------------|----------------|----------------|----------------|---------------------------------|----------------|----------------|----------------|---------------------------|----------------|----------------|----------------|
|               | Model 1              |                | Model 2        |                | Model 1                         |                | Model 2        |                | Model 1                   |                | Model 2        |                |
|               | R <sup>2</sup>       | <i>p</i> value | R <sup>2</sup> | <i>p</i> value | R <sup>2</sup>                  | <i>p</i> value | R <sup>2</sup> | <i>p</i> value | R <sup>2</sup>            | <i>p</i> value | R <sup>2</sup> | <i>p</i> value |
| CMBs          |                      |                |                |                |                                 |                |                |                |                           |                |                |                |
| Lobar only    | 0.066                | 0.713          | 0.086          | 0.538          | 0.083                           | 0.559          | 0.096          | 0.710          | 0.072                     | 0.510          | 0.090          | 0.484          |
| Any deep      | 0.125                | 0.508          | 0.137          | 0.648          | 0.154                           | 0.164          | 0.168          | 0.169          | 0.128                     | 0.489          | 0.143          | 0.476          |
| Severe PVS    |                      |                |                |                |                                 |                |                |                |                           |                |                |                |
| Severe PVS-BG | 0.059                | 0.284          | 0.081          | 0.411          | 0.056                           | 0.970          | 0.079          | 0.980          | 0.063                     | 0.199          | 0.083          | 0.367          |
| Severe PVS-WM | 0.021                | 0.745          | 0.027          | 0.810          | 0.024                           | 0.941          | 0.029          | 0.982          | 0.022                     | 0.731          | 0.029          | 0.756          |

WMH indicates white matter hyperintensity; CMBs, cerebral microbleeds; PVS, perivascular space; DMVs, deep medullary veins.

\*Systemic biomarkers include hsCRP, IL-6, and TNF- $\alpha$ .

†Endothelial-related biomarkers include E-selectin, P-selectin, ICAM-1, VCAM-1, CD40L, tHcy, Lp-PLA2, and YKL-40.

‡ Media-related biomarkers include MMP-2, MMP-3, MMP-9, and OPN.

Model 1 is adjusted for age and sex; model 2 is adjusted for age, sex, current smoking, hypertension, diabetes mellitus, and hyperlipidemia.
